# Supplementary material for: An hourglass circuit motif transforms a motor program via subcellularly localized muscle calcium signaling and contraction
Source: eLife journal article supplement (doi:10.7554/elife.59341), 2021-07-02
Supplement: fig2-data1 [file Sando et al. Figure 2F.xlsx]

## Sheet: Figure 2F
	Condition	Day	Animal number	Before light			During light				approximation of zeros for statistics (see Behavioral statistics)		file name
				No. pumps - filter open	No. pumps - filter closed	Fraction pumps with open filter	No. pumps - filter open	No. pumps - filter closed	Fraction pumps with open filter	log(fraction) for statistics
	mock-ablated	12.17.2019	1	0	32	0	20	0	1	0			nIs507_AB26_mock_01_20191217
			5	0	6	0	27	0	1	0			nIs507_AB26_mock_05_20191217
		12.19.2019	4	n/a	n/a	n/a	14	4	0.777778	-0.109144			nIs507_AB27_mock_04_20191219
			5	1	25	0.0384615	9	5	0.642857	-0.191886			nIs507_AB27_mock_05_20191219
			6	n/a	n/a	n/a	14	0	1	0			nIs507_AB27_mock_06_20191219
		12.20.2019	1	0	7	0	5	1	0.833333	-0.0791812			nIs507_AB28_mock_01_20191220
			2	0	4	0	7	0	1	0			nIs507_AB28_mock_02_20191220
		12.16.19	3	3	35	0.0789474	14	9	0.608696	-0.2156			nIs507_AB25_pm2_minus_03_20191216
		12.17.2019	1	0	29	0	1	14	0.0666667	-1.17609			nIs507_AB26_pm2_minus_01_20191217
			3	0	28	0	4	21	0.16	-0.79588			nIs507_AB26_pm2_minus_03_20191217
			4	0	39	0	7	10	0.411765	-0.385351			nIs507_AB26_pm2_minus_04_20191217
			5	2	31	0.0606061	6	14	0.3	-0.522879			nIs507_AB26_pm2_minus_05_20191217
		12.19.2019	1	0	24	0	0	17	0	-1	0.1	<--approximation	nIs507_AB27_pm2_minus_01_20191219
			3	1	38	0.025641	0	6	0	-1	0.1	<--approximation	nIs507_AB27_pm2_minus_03_20191219
		12.20.2019	1	0	5	0	2	5	0.285714	-0.544068			nIs507_AB28_pm2_minus_01_20191220
