# Supplementary material for: An hourglass circuit motif transforms a motor program via subcellularly localized muscle calcium signaling and contraction
Source: eLife journal article supplement (doi:10.7554/elife.59341), 2021-07-02
Supplement: fig4-data1 [file Fig 4H-4L - HisCl.xlsx]

## Sheet: time to first spit
Raw time stamp						Time since first illumination
	date	Array-, His+	Array+, His-	Array+,His+		Array-, His+	Array+, His-	Array+,His+
	7.6.2020	13537	11390	20027		3.537	1.39	10.027
			12069	17151			2.069	7.151
				17215				7.215
	7.7.2020	11749	11804	15505		1.749	1.804	5.505
		10821	10724	17640		0.821	0.724	7.64
		11520	11791	16914		1.52	1.791	6.914
			10551	16303			0.551	6.303
				16655				6.655
