# Supplementary material for: An hourglass circuit motif transforms a motor program via subcellularly localized muscle calcium signaling and contraction
Source: eLife journal article supplement (doi:10.7554/elife.59341), 2021-07-02
Supplement: fig4-figsupp1-data1 [file Sando et al. Figure 4--figure supplement 1.xlsx]

## Sheet: Fig Sup 4-1J,1L
condition	date	Animal	Max F/F0 (%)*	time (s) -->
control	20150121		*see .mat files for absolute F values		0	0.5	1	1.5	2	2.5	3	3.5	4	4.5	5	5.5	6	6.5	7	7.5	8	8.5	9	9.5	10	10.5	11	11.5	12	12.5	13	13.5
			91.8935		0	0.129155	0.108492	0.210965	0.428401	0.54881	0.696081	0.771964	0.847765	0.89149	0.918935	0.900905	0.879086	0.877382	0.869865	0.877502	0.851772	0.839968	0.855005	0.84707	0.818294	0.784072	0.783229	0.740161	0.729732	0.711212	0.685964	0.670084
			122.737		0	0.0700551	0.0837883	0.0911126	0.177814	0.344681	0.623385	0.82635	0.959658	1.04825	1.13391	1.19144	1.21437	1.22737	1.19314	1.19514	1.16235	1.16663	1.1394	1.13254	1.089	1.06308	0.970564	0.941492	0.920636	0.879286	0.830755	0.805227
			163.456		0	0.0344342	0.111206	0.653304	0.976462	1.37262	1.6074	1.58893	1.63033	1.58802	1.58211	1.57919	1.563	1.63456	1.63285	1.62153	1.58394	1.55413	1.51375	1.45069	1.38276	1.32227	1.29263	1.22723	1.19879	1.14447	1.12243	1.09428
			109.995		0	0.237259	0.68798	0.757317	0.820661	1.09995	1.06951	0.977854	0.973748	0.983304	0.983289	0.972733	0.985503	0.996563	0.985205	0.964978	0.924442	0.890777	0.842571	0.79134	0.74237	0.709979	0.652764	0.616583	0.560654	0.537301	0.507904	0.47758
			79.365		0	0.147564	0.218333	0.300982	0.506283	0.67663	0.79365	0.790989	0.751602	0.792484	0.793534	0.748456	0.72088	0.692946	0.6659	0.641344	0.6338	0.600188	0.571104	0.573988	0.532681	0.556026	0.54087	0.563857	0.542545	0.531221	0.51712	0.496186
			86.1474		0	0.0987381	0.0917223	0.16707	0.379245	0.609115	0.791015	0.825244	0.861474	0.823692	0.737809	0.660064	0.584045	0.544586	0.533272	0.526822	0.513216	0.451257	0.370969	0.347701	0.311338	0.273597	0.240593	0.223275	0.217981	0.200561	0.192295	0.166309
			127.987		0	0.0553749	0.05695	0.110021	0.426886	0.798059	0.972144	1.23059	1.17157	1.1351	1.21803	1.27987	1.194	1.16326	1.12421	1.09542	1.10483	1.07471	1.07526	1.05642	1.0387	0.973703	0.942986	0.87832	0.847076	0.816868	0.770108	0.73718
			125.884		0	0.0543892	0.041091	0.0711437	0.125424	0.215878	0.409292	0.542268	0.747349	0.895694	1.09062	1.20186	1.25825	1.25578	1.22607	1.25884	1.23806	1.18682	1.15219	1.13811	1.11669	1.10732	1.07611	1.03162	0.966811	0.945393	0.874752	0.8311
			124.055		0	0.126592	0.148497	0.269431	0.426041	0.725661	0.969905	1.17117	1.21961	1.24055	1.23972	1.23065	1.21404	1.1973	1.13304	1.08442	1.04643	1.01912	0.987007	0.980912	0.978898	0.943583	0.905133	0.899912	0.867531	0.847113	0.837479	0.831439
			120.395		0	0.0129246	0.0251026	0.0244486	0.0621335	0.10189	0.251008	0.647304	0.747527	0.802564	0.890613	1.00284	1.11455	1.16221	1.19072	1.19645	1.20395	1.18406	1.19371	1.15363	1.10194	1.06783	1.02412	0.97274	0.881191	0.788296	0.692575	0.617227
			92.2316		0	0.000930145	0.0161614	0.0882592	0.459539	0.655427	0.789552	0.87379	0.890419	0.922316	0.903703	0.880131	0.856491	0.860106	0.841083	0.82068	0.798471	0.772056	0.757236	0.725915	0.700446	0.669348	0.666366	0.675561	0.638243	0.593994	0.597907	0.561652
			136.571		0	0.357544	0.816892	1.14818	1.32142	1.36571	1.35548	1.27785	1.12984	1.22005	1.13093	1.04336	1.03339	1.03946	1.00146	0.964616	0.928107	0.946064	0.967514	0.959412	0.884554	0.864928	0.850375	0.782517	0.745905	0.725336	0.668101	0.613305
			163.692		0	0.0896992	0.731663	1.02079	1.47473	1.5887	1.60364	1.54851	1.4946	1.48581	1.50976	1.51401	1.50361	1.5195	1.60986	1.62684	1.62666	1.63692	1.60785	1.57416	1.56938	1.50227	1.47291	1.43215	1.34962	1.29867	1.28066	1.24905
			42.9608		0	0.0311356	0.0372955	0.0829729	0.176734	0.218556	0.2445	0.274062	0.265491	0.337615	0.35457	0.387758	0.374363	0.416097	0.423838	0.414514	0.419051	0.420806	0.422473	0.403665	0.409775	0.429608	0.39632	0.36114	0.343769	0.33416	0.302534	0.280399
			99.7194		0	0.1431	0.100938	0.203672	0.708093	0.833032	0.997194	0.800606	0.606164	0.578048	0.524337	0.525653	0.572515	0.592208	0.606458	0.585043	0.563837	0.572517	0.562527	0.592369	0.622024	0.651903	0.669683	0.672118	0.690683	0.686261	0.674648	0.649217
			73.56		0	0.108132	0.0412651	-0.00471018	-0.00271754	0.111909	0.455031	0.653885	0.613116	0.7356	0.641648	0.691315	0.632673	0.555705	0.485218	0.399373	0.370659	0.342349	0.32504	0.371369	0.406141	0.455607	0.462438	0.466587	0.465332	0.4845	0.484866	0.484094
			106.161		0	0.0416635	0.0796654	0.258773	0.546267	0.762325	0.946743	0.993077	1.03158	1.03463	1.06161	1.02803	1.0044	0.996947	0.988093	0.965042	0.922706	0.865357	0.846228	0.841426	0.805891	0.759204	0.731599	0.705558	0.715383	0.706533	0.648219	0.608591
			53.2861		0	0.121684	0.457067	0.532861	0.491145	0.519194	0.505543	0.432728	0.397503	0.388357	0.375228	0.350442	0.352204	0.350628	0.337057	0.306336	0.291109	0.242352	0.199499	0.174953	0.143397	0.107294	0.104417	0.0918157	0.077505	0.0773043	0.0737288	0.0832559
			89.5338		0	0.159102	0.666267	0.589479	0.895338	0.846681	0.801061	0.78186	0.833845	0.862026	0.876039	0.872546	0.870766	0.852459	0.813496	0.757976	0.744881	0.718645	0.666982	0.63298	0.613536	0.593786	0.574687	0.55715	0.546868	0.541103	0.531098	0.521341
			80.601		0	0.0623628	0.0931748	0.160796	0.340429	0.484374	0.580667	0.65641	0.690375	0.702358	0.721611	0.726099	0.766826	0.79817	0.80601	0.780381	0.767967	0.760328	0.749539	0.730662	0.72497	0.695412	0.64548	0.609692	0.566206	0.521413	0.487381	0.47405
			126.357		0	0.0229207	0.0335842	0.0691163	0.220821	0.464521	0.964043	1.02777	1.14531	1.17802	1.21122	1.21272	1.22745	1.23546	1.24266	1.26357	1.24316	1.2107	1.14766	1.081	1.01076	0.98072	0.966329	0.942068	0.893442	0.891355	0.85936	0.81322
			120.515		0	0.0113574	0.0124786	0.0405564	0.282223	0.387646	0.491301	0.564249	0.680566	0.784453	0.919689	1.04484	1.12177	1.16449	1.1876	1.20515	1.18303	1.14998	1.11657	1.1334	1.10229	1.02345	0.955299	0.892781	0.84718	0.750106	0.722676	0.684891
control	20150304
			52.0794		0	0.0247639	0.0283054	0.0289594	0.0768891	0.17124	0.238576	0.292443	0.372266	0.441696	0.48988	0.51932	0.520794	0.513301	0.511101	0.503737	0.465549	0.441527	0.424487	0.413905	0.388295	0.366693	0.340382	0.336081	0.333414	0.315076	0.316633	0.306856
			93.2325		0	0.224539	0.203444	0.43896	0.75819	0.932325	0.883362	0.793126	0.798162	0.845261	0.87782	0.907683	0.91679	0.887844	0.860414	0.840652	0.837589	0.836095	0.795566	0.754119	0.729363	0.682795	0.62935	0.610416	0.596483	0.564072	0.546065	0.527532
			85.6484		0	-0.00244455	0.0111288	0.14853	0.437924	0.673815	0.782013	0.805188	0.84405	0.856484	0.849272	0.836558	0.801309	0.782133	0.749701	0.739869	0.706607	0.690037	0.645964	0.614073	0.591606	0.577774	0.569896	0.558403	0.553228	0.542476	0.538392	0.523499
			48.8825		0	0.127481	0.124333	0.340586	0.440714	0.488825	0.457037	0.421773	0.393263	0.382267	0.363432	0.362603	0.354124	0.343357	0.309335	0.302265	0.302109	0.274116	0.251641	0.228682	0.217983	0.187281	0.191521	0.190354	0.172895	0.159434	0.158053	0.127723
			53.9672		0	0.0493572	0.0534074	0.0647416	0.0939003	0.179907	0.331763	0.451536	0.508275	0.539672	0.535944	0.517806	0.509941	0.486575	0.482222	0.470597	0.467497	0.452577	0.418796	0.391607	0.372698	0.354916	0.320447	0.275592	0.240819	0.220922	0.195319	0.169179
			52.5461		0	0.108539	0.0998924	0.149128	0.327868	0.430784	0.476119	0.508686	0.491996	0.525461	0.518609	0.486121	0.472597	0.46003	0.426369	0.412233	0.393832	0.359842	0.328542	0.294098	0.293292	0.272363	0.265615	0.251769	0.249662	0.239233	0.230403	0.244347
			59.3833		0	0.0872654	0.231524	0.390836	0.493042	0.50395	0.593833	0.536316	0.500888	0.501286	0.489245	0.491519	0.494991	0.471665	0.432737	0.413909	0.371383	0.333587	0.300915	0.288837	0.279805	0.272757	0.265017	0.274445	0.266367	0.248836	0.250295	0.242337
			37.039		0	0.0687987	0.165133	0.251001	0.236539	0.268794	0.309676	0.294439	0.328356	0.340314	0.356286	0.37039	0.356748	0.350571	0.344091	0.31683	0.288857	0.255251	0.221929	0.200091	0.200894	0.205904	0.191828	0.182786	0.16359	0.161662	0.143276	0.143111
			58.1461		0	0.0309049	0.0177249	0.0366598	0.108036	0.203235	0.2995	0.382952	0.49045	0.543797	0.57285	0.581461	0.571496	0.565163	0.563033	0.572851	0.565583	0.531697	0.507186	0.451497	0.419332	0.380428	0.353001	0.314435	0.294707	0.290715	0.256621	0.242113
			49.0953		0	0.0778991	0.152768	0.2962	0.39966	0.460357	0.476713	0.490953	0.478078	0.48491	0.476267	0.476708	0.468262	0.450412	0.422501	0.408457	0.391066	0.364412	0.330773	0.329658	0.300396	0.2829	0.25131	0.223452	0.183689	0.165691	0.166826	0.155395
			115.074		0	0.00771654	0.0185924	0.0386244	0.482527	0.373336	0.446771	0.862233	0.933568	1.14662	1.11852	1.13815	1.15074	1.0889	1.1176	1.09187	1.06661	1.06021	1.03662	1.06398	1.0538	1.03201	0.94468	0.922332	0.86488	0.856548	0.856392	0.84897
			72.179		0	0.177365	0.238268	0.501229	0.640788	0.720945	0.72179	0.68924	0.620428	0.59878	0.587113	0.578134	0.578569	0.579067	0.560614	0.528158	0.517496	0.485853	0.440963	0.417024	0.396523	0.382233	0.365075	0.356978	0.336612	0.354808	0.349675	0.360993
			59.0535		0	0.0315573	0.0450868	0.1174	0.218795	0.310731	0.412676	0.496654	0.539047	0.588376	0.590535	0.585916	0.590114	0.542521	0.506404	0.503473	0.478874	0.45188	0.430908	0.407675	0.377888	0.351128	0.302983	0.263913	0.232814	0.221691	0.202963	0.199841
			54.1594		0	0.00189379	0.0106988	0.0454254	0.130632	0.263419	0.418395	0.510876	0.538176	0.541594	0.541269	0.528563	0.522196	0.524297	0.512747	0.50127	0.497334	0.49729	0.488177	0.486327	0.471889	0.470566	0.45634	0.445156	0.433466	0.423624	0.407709	0.394963
			66.6817		0	0.116543	0.0913288	0.0774641	0.147049	0.510415	0.476469	0.666817	0.5373	0.409401	0.309548	0.245694	0.213459	0.188166	0.169733	0.158047	0.155129	0.165639	0.160589	0.153725	0.146815	0.135777	0.15218	0.116773	0.101557	0.0945933	0.0881377	0.0790442
			75.2259		0	0.0682494	0.0603264	0.398683	0.44053	0.744442	0.710305	0.706456	0.677225	0.696407	0.752259	0.738514	0.739605	0.724641	0.700858	0.737391	0.738034	0.711032	0.680022	0.661237	0.635173	0.564191	0.530635	0.497727	0.474484	0.441759	0.444647	0.415112
			31.5543		0	0.0897884	0.0982357	0.231569	0.315543	0.301348	0.27568	0.271285	0.25626	0.295428	0.287378	0.29089	0.278238	0.260901	0.253549	0.26456	0.262149	0.243948	0.230839	0.226094	0.203615	0.18773	0.175365	0.147846	0.12704	0.116955	0.111468	0.0891205
			66.2073		0	0.0219129	0.0352743	0.0860103	0.29772	0.434525	0.485992	0.578867	0.634444	0.637195	0.662073	0.648699	0.643509	0.61026	0.601946	0.574222	0.54881	0.533598	0.509289	0.481676	0.450427	0.433042	0.441997	0.419852	0.395924	0.427009	0.406082	0.410631
			39.0253		0	0.0440719	0.0472379	0.119074	0.238189	0.327211	0.356066	0.384303	0.380359	0.390253	0.38569	0.367683	0.360287	0.352069	0.350512	0.337441	0.336619	0.316647	0.295644	0.28748	0.280414	0.272374	0.252507	0.24472	0.223373	0.208485	0.18999	0.200156
unc-13(s69)	20150121
			22.0588		0	0.0347181	-0.0240272	0.0313528	0.148356	0.211344	0.220588	0.212527	0.195621	0.176929	0.148128	0.145491	0.147452	0.129854	0.103397	0.100656	0.09042	0.0666271	0.0637213	0.047383	0.0242752	0.0159237	0.00651761	0.0112094	0.00752503	0.00566396	-0.00644542	-0.0132902
			2.42302		0	-0.0120487	0.0185706	-0.00908424	-0.0136154	0.0100811	0.00400184	0.00338794	0.000314172	-0.0121367	-0.00401186	-0.0188382	-0.00849731	0.0199183	-0.016598	-0.00479017	-0.0111728	0.0100725	0.0242302	0.00460305	0.0169145	0.0109523	-0.00675845	0.0110272	-0.01353	0.00922373	0.0109373	0.0212252
			62.5046		0	0.428156	0.489478	0.512448	0.57888	0.61062	0.605192	0.625046	0.584789	0.586018	0.570951	0.550894	0.539017	0.50365	0.511292	0.495204	0.473303	0.446418	0.394904	0.358604	0.345701	0.350233	0.355509	0.327295	0.293744	0.282027	0.26931	0.261461
			74.9004		0	0.479045	0.683432	0.749004	0.698627	0.707417	0.665424	0.596541	0.601317	0.615159	0.638096	0.52053	0.611552	0.452083	0.641098	0.507516	0.485681	0.642068	0.491282	0.306988	0.198527	0.12917	0.0899581	0.558312	0.416721	0.247028	0.137782	0.0634583
			67.8886		0	0.236974	0.434264	0.59862	0.656964	0.630183	0.678886	0.638713	0.64567	0.650819	0.649202	0.659447	0.636812	0.634633	0.651729	0.585068	0.611108	0.593013	0.592823	0.562936	0.55418	0.561948	0.542654	0.542479	0.524055	0.51473	0.502404	0.477654
			262.091		0	0.934176	1.82175	2.42428	2.58842	2.61351	2.62091	2.54293	2.58024	2.5595	2.52259	2.52645	2.50053	2.53124	2.42271	2.4326	2.41202	2.39037	2.32828	2.32586	2.29629	2.26251	2.21659	2.15199	2.11633	2.08562	2.07286	2.02857
			73.7304		0	0.49729	0.551339	0.706565	0.712452	0.714829	0.737304	0.735783	0.721202	0.708503	0.727374	0.704617	0.666078	0.637541	0.63251	0.621977	0.599866	0.580333	0.571364	0.574525	0.435762	0.478954	0.458704	0.397731	0.389423	0.392672	0.352731	0.356032
			52.0998		0	0.370419	0.416876	0.498979	0.508941	0.520998	0.519107	0.505243	0.496583	0.485653	0.478254	0.469368	0.458894	0.44361	0.4248	0.40847	0.367576	0.345696	0.335852	0.308589	0.255319	0.205079	0.188574	0.184594	0.196401	0.184932	0.207757	0.211219
			51.4881		0	0.00654287	0.00718974	0.0039925	-0.00353311	0.0109722	0.00243334	-0.00253995	0.00197088	-0.00753682	-0.0187934	0.047796	0.329078	0.391538	0.315338	0.208273	0.137831	0.112265	0.0896741	0.0547487	0.0467246	0.0334389	0.0724938	0.292747	0.45971	0.514881	0.420388	0.296073
			91.1425		0	0.504514	0.688431	0.865699	0.890607	0.911425	0.867491	0.877261	0.843447	0.847985	0.755098	0.698364	0.699336	0.689599	0.59323	0.502762	0.440199	0.407341	0.358833	0.320287	0.304582	0.259045	0.20102	0.185335	0.164888	0.18775	0.222232	0.259295
			84.7085		0	0.206002	0.42271	0.653451	0.553266	0.633288	0.819721	0.707716	0.589641	0.766355	0.822114	0.847085	0.691616	0.529586	0.695625	0.711218	0.639522	0.703216	0.655076	0.566114	0.397703	0.30308	0.382873	0.48645	0.454915	0.39202	0.315046	0.22875
			67.6696		0	0.376333	0.504969	0.609186	0.671038	0.667782	0.676696	0.653434	0.648389	0.643361	0.65431	0.62072	0.612989	0.594649	0.549774	0.550156	0.521447	0.486004	0.475099	0.450992	0.416695	0.420332	0.423697	0.429011	0.413403	0.411181	0.414601	0.431516
			40.9089		0	0.190789	0.341008	0.392772	0.409089	0.407134	0.373381	0.362143	0.337867	0.355838	0.356994	0.335457	0.329125	0.313184	0.305531	0.297924	0.262266	0.240034	0.233585	0.208834	0.190973	0.175473	0.171931	0.1706	0.176986	0.160773	0.158834	0.151681
			172.684		0	0.196956	1.08574	1.53614	1.6816	1.72038	1.72684	1.68501	1.66762	1.61533	1.54999	1.5133	1.50415	1.49676	1.45163	1.35102	1.37803	1.39408	1.37863	1.37979	1.35095	1.13849	0.942223	0.886446	0.79783	0.711787	0.68696	0.598366
			136.567		0	0.871601	1.25766	1.34358	1.3475	1.36567	1.2757	1.24588	1.24746	1.21144	1.09794	1.05148	0.932718	0.889199	0.848965	0.731657	0.810997	0.689085	0.639479	0.602114	0.563261	0.538481	0.530392	0.485233	0.409205	0.368196	0.293821	0.253441
			75.8366		0	0.181115	0.476691	0.661441	0.738509	0.746133	0.747	0.758366	0.687341	0.692703	0.654146	0.646671	0.629096	0.62262	0.576063	0.55062	0.558481	0.520866	0.489407	0.51477	0.487149	0.467096	0.432628	0.41508	0.422902	0.415083	0.406157	0.381009
			68.076		0	0.387658	0.592014	0.655562	0.646375	0.68076	0.657759	0.679173	0.605143	0.578637	0.568513	0.534591	0.507572	0.478065	0.434926	0.391765	0.374993	0.354949	0.314337	0.293743	0.284524	0.273305	0.193724	0.153672	0.115023	0.081309	0.034126	0.020153
			64.7894		0	0.413341	0.527495	0.634639	0.637416	0.647894	0.643043	0.635238	0.641915	0.627796	0.596092	0.588147	0.53832	0.54762	0.536933	0.53487	0.509898	0.492444	0.430431	0.403906	0.368081	0.352772	0.314991	0.29528	0.276443	0.303322	0.309007	0.302671
			179.26		0	0.315913	0.670078	1.40745	1.74371	1.75031	1.7926	1.78421	1.75053	1.73541	1.73308	1.71336	1.68315	1.66055	1.60742	1.55114	1.49256	1.44506	1.43222	1.36925	1.33528	1.31687	1.31866	1.2756	1.21422	1.19401	1.13993	1.17058
			65.7024		0	0.372294	0.572151	0.629217	0.656451	0.651434	0.657024	0.627486	0.647384	0.636521	0.636562	0.625999	0.614775	0.619371	0.619525	0.597055	0.599864	0.589672	0.577329	0.579409	0.560221	0.549087	0.543364	0.542586	0.535604	0.513206	0.500864	0.485757
			118.952		0	0.0952288	0.708512	0.567763	0.433706	0.524832	0.939707	0.794791	1.17556	0.97803	1.18952	0.99533	1.14406	1.01736	1.16282	1.00273	1.12594	1.02396	1.09187	1.00771	1.03655	1.10424	1.06134	0.903621	1.05989	0.88148	1.01448	0.89006
			0.702508		0	-0.013049	-0.0137301	-0.0172973	0.0032783	-0.00614178	0.00347259	-0.0217476	-0.00855694	-0.014477	-0.0150832	-0.000804539	8.23912e-05	0.00702508	-0.00461884	-0.000189171	-0.0243715	-0.0267675	0.00584924	-0.0138282	-0.0139898	-0.0219784	-0.0122818	-0.00990149	-0.0112836	-0.00204364	-0.011599	-0.0118289
unc-13(s69)	20150304
			40.3316		0	0.211362	0.34031	0.385078	0.396704	0.403316	0.378225	0.354312	0.343896	0.327955	0.245044	0.201027	0.160237	0.134348	0.120204	0.130654	0.132216	0.128843	0.155286	0.167877	0.157582	0.161224	0.193881	0.234698	0.235485	0.2116	0.214418	0.18848
			36.6215		0	0.0989005	0.290661	0.355877	0.357769	0.347551	0.366215	0.332149	0.302926	0.297029	0.290816	0.282309	0.276648	0.277024	0.28764	0.27674	0.269474	0.260819	0.247236	0.225504	0.205948	0.197432	0.192026	0.164759	0.143137	0.115962	0.0906075	0.0885666
			78.7629		0	-0.00925479	-0.0678623	-0.0197488	0.261852	0.683094	0.699486	0.787629	0.752373	0.694528	0.623129	0.621811	0.524195	0.451289	0.379614	0.319285	0.247184	0.259943	0.29231	0.291254	0.33553	0.331235	0.338393	0.322249	0.347588	0.355357	0.379099	0.382015
			35.3869		0	-0.00776448	0.172633	0.286146	0.351735	0.353869	0.346766	0.312121	0.291883	0.273137	0.23408	0.211127	0.156453	0.14006	0.118084	0.0908778	0.0743396	0.0670213	0.0572295	0.0502071	0.0302001	0.0259961	0.044125	0.0427206	0.0535913	0.0457054	0.0359147	0.0230484
			23.4878		0	0.00466194	0.15064	0.230606	0.233028	0.234878	0.221219	0.210898	0.204938	0.173047	0.129698	0.145141	0.0466338	-0.00539338	-0.0348102	-0.0471441	-0.0944086	-0.139072	-0.166912	-0.179313	-0.182749	-0.207112	-0.216159	-0.223066	-0.228817	-0.240271	-0.242309	-0.235312
			28.4672		0	0.0665195	0.143755	0.200358	0.278995	0.284672	0.260569	0.235011	0.241155	0.214185	0.189119	0.171246	0.155376	0.116411	0.116181	0.129389	0.113283	0.0731464	0.093809	0.0638479	0.063055	0.0333947	0.0320893	0.0292576	-0.0077071	1.31074e-05	0.00262818	-0.00746812
			56.0696		0	0.00238522	0.00750863	0.220422	0.443209	0.536788	0.545698	0.560696	0.546699	0.48671	0.456437	0.397683	0.392408	0.360836	0.310336	0.256284	0.207473	0.169566	0.139139	0.127609	0.133951	0.139594	0.169854	0.186564	0.176137	0.156349	0.145039	0.119387
			56.4518		0	0.00603783	0.171001	0.468362	0.555604	0.564518	0.517522	0.535844	0.502308	0.480823	0.468749	0.45422	0.420275	0.376445	0.348773	0.307279	0.239167	0.199617	0.15043	0.102758	0.0556451	0.0394957	0.0123512	-0.00285588	-0.00861797	-0.00312511	-0.0179151	-0.0169979
			61.9054		0	0.0905571	0.311678	0.425439	0.616051	0.619054	0.580518	0.610444	0.539659	0.549451	0.511147	0.449243	0.416362	0.393271	0.357777	0.304609	0.296193	0.266873	0.251521	0.259766	0.279254	0.292788	0.287556	0.287744	0.26641	0.270998	0.27221	0.281605
			53.232		0	-0.00961398	-0.00628689	0.0214632	0.116241	0.253808	0.422594	0.504754	0.53232	0.531915	0.529621	0.518858	0.486985	0.44792	0.404404	0.381815	0.360223	0.323797	0.300672	0.274778	0.243007	0.211495	0.182505	0.167164	0.148475	0.134296	0.129135	0.110562
			42.2943		0	0.162408	0.36033	0.422943	0.422405	0.413151	0.405509	0.363844	0.365539	0.318123	0.312005	0.250383	0.214636	0.186412	0.173522	0.172725	0.165552	0.155926	0.168571	0.175412	0.161828	0.145025	0.120772	0.104622	0.0990697	0.10514	0.0895381	0.0808359
			49.6025		0	-0.0192836	-0.0193128	-0.0182285	-0.0190089	-0.0127824	0.0058097	0.0338884	0.125689	0.235772	0.348488	0.43417	0.475281	0.491274	0.496025	0.489097	0.470792	0.462887	0.437118	0.429433	0.409644	0.414032	0.397918	0.361763	0.329147	0.300721	0.269457	0.229331
			47.4169		0	-0.014899	-0.0134689	0.108295	0.303362	0.447776	0.474169	0.452326	0.429453	0.407201	0.347989	0.299847	0.289912	0.263621	0.251661	0.232327	0.183389	0.186217	0.143851	0.10699	0.0834598	0.0587719	0.0494964	0.0263499	0.0147933	0.0283414	0.00916684	-0.00142088
			8.80535		0	0.0542316	0.054833	0.072831	0.0880535	0.0828934	0.0682004	0.0701095	0.0576805	0.0462267	0.0442916	0.054778	0.0483944	0.039996	0.0371117	0.0232529	0.0278368	0.011043	-0.00550136	-0.00540021	-0.00404738	-0.014502	-0.0512795	-0.0553473	-0.072861	-0.0599304	-0.0787777	-0.0735625
			77.148		0	0.025692	0.0863923	0.505119	0.702514	0.76409	0.738612	0.77148	0.770184	0.741886	0.729564	0.702058	0.694077	0.634553	0.595112	0.563926	0.525277	0.492331	0.429154	0.376809	0.370904	0.33605	0.321429	0.302285	0.255728	0.238285	0.208811	0.182264
			29.3949		0	-0.0243304	-0.114225	-0.163789	-0.188978	-0.0408563	0.155157	0.250339	0.185992	0.290052	0.248663	0.158993	0.254397	0.293949	0.126419	0.20363	0.270399	0.181562	0.137507	0.16465	0.1124	0.147363	0.163332	0.065206	-0.0588359	-0.0789749	0.0209845	-0.0563275
			33.1106		0	0.0482997	0.183841	0.291895	0.331106	0.330988	0.318517	0.284778	0.312316	0.297584	0.296887	0.280899	0.256691	0.257449	0.237254	0.237097	0.215138	0.192424	0.156188	0.157333	0.163304	0.125812	0.132991	0.119219	0.104616	0.0978801	0.0950864	0.0820995
			52.3832		0	-0.0102412	-0.0069421	0.000532291	0.0514321	0.166745	0.287391	0.427137	0.509024	0.521896	0.523832	0.491316	0.461126	0.436235	0.384264	0.312102	0.25957	0.217212	0.184288	0.148282	0.117919	0.0988111	0.0811767	0.0580303	0.0493642	0.0318798	0.0260202	0.0254164
			49.9209		0	0.0532509	0.349999	0.480971	0.495316	0.499209	0.49442	0.45485	0.414325	0.359823	0.30454	0.270649	0.269323	0.286912	0.278861	0.260735	0.265193	0.27484	0.291405	0.307281	0.303038	0.271096	0.254361	0.234241	0.211163	0.20972	0.195487	0.165351
			85.6847		0	-0.0148175	0.204532	0.563891	0.803465	0.856847	0.758224	0.813452	0.703318	0.645115	0.668819	0.658721	0.556902	0.530943	0.531217	0.388954	0.303249	0.258483	0.184836	0.152625	0.13323	0.183164	0.193863	0.215814	0.278624	0.325142	0.324815	0.334666
unc-31(u280)	20150304		0
			30.507		0	0.2189	0.301764	0.30507	0.27302	0.243905	0.217611	0.20272	0.212819	0.209999	0.217469	0.213833	0.190896	0.157913	0.134185	0.106053	0.0998997	0.082238	0.0594807	0.0353143	0.0369911	0.0277928	0.0187741	0.0144881	0.0260733	0.036882	0.0320221	0.0164
			38.3541		0	0.126298	0.160544	0.246807	0.33317	0.383541	0.288204	0.346854	0.362132	0.279306	0.247065	0.239016	0.263601	0.266577	0.278019	0.24583	0.239234	0.22956	0.227489	0.209437	0.179583	0.156466	0.13523	0.118838	0.0855015	0.0600289	0.0301638	-0.0109755
			44.0295		0	-0.0111463	0.0128402	0.0689148	0.118324	0.155961	0.217039	0.255685	0.310688	0.362741	0.418094	0.415422	0.440295	0.411939	0.416564	0.398099	0.370948	0.342509	0.352706	0.347593	0.358351	0.351156	0.332395	0.34522	0.335422	0.346023	0.347462	0.352581
			11.7079		0	0.0799261	0.117079	0.0970294	0.0662931	0.0990212	0.0593489	0.00303461	0.016907	0.0129242	0.0244544	0.0261763	0.032216	0.0238187	0.0204639	-0.0023528	-0.0329663	-0.0556161	-0.0901155	-0.106072	-0.136635	-0.146315	-0.167207	-0.177002	-0.186627	-0.186428	-0.198124	-0.201104
			23.0028		0	0.167851	0.230028	0.207241	0.22518	0.198284	0.155648	0.162384	0.134235	0.117324	0.145395	0.102494	0.0164956	0.0993218	0.0864331	0.125046	0.102094	0.135653	0.0913143	0.108152	0.145557	0.100203	0.0425763	0.136189	0.0500825	-0.0111107	-0.0429704	0.00173675
			32.0112		0	0.0699056	-0.0369724	-0.105101	-0.122053	0.226106	0.251422	0.320112	0.24582	0.242812	0.240691	0.245928	0.224319	0.221308	0.21198	0.222921	0.246345	0.238181	0.247571	0.177798	0.242312	0.248921	0.18185	0.241481	0.193412	0.210042	0.172568	0.20437
			95.5807		0	-0.0312754	-0.0331651	-0.0226182	0.416044	0.491296	0.353096	0.706768	0.952232	0.668752	0.890029	0.743468	0.480983	0.7121	0.889152	0.686708	0.955807	0.63461	0.356762	0.218545	0.125368	0.254191	0.332675	0.218174	0.163056	0.103302	0.0791224	0.136669
			30.3894		0	0.145389	0.277334	0.303894	0.300038	0.290618	0.286992	0.208617	0.155674	0.160776	0.140142	0.155761	0.191895	0.191219	0.197467	0.178425	0.167676	0.166458	0.125449	0.0756254	0.0350011	0.0023494	-0.0300084	-0.0689843	-0.0797306	-0.0964741	-0.105395	-0.101346
			17.5074		0	0.0687085	0.166297	0.171651	0.0485988	0.0978206	0.0674573	0.0520415	0.175074	0.0889242	0.148843	0.00458795	0.0698438	0.00313631	-0.0538199	-0.016459	-0.110197	-0.155542	-0.114513	-0.143831	0.0437879	0.0201094	-0.0603673	-0.0166151	-0.040406	-0.0656262	-0.0782745	-0.0972453
			35.5146		0	0.215826	0.312932	0.355146	0.325781	0.267716	0.164433	0.0976762	0.0402168	0.00790843	0.0173571	-0.0111112	-0.023656	-0.0353177	-0.0279908	-0.0482491	-0.047302	-0.0592205	-0.082954	-0.0806513	-0.0872895	-0.0876075	-0.0839081	-0.0878999	-0.0937699	-0.0862378	-0.0831045	-0.0823931
			30.1416		0	0.0616036	0.209556	0.173492	0.272611	0.301416	0.244513	0.195793	0.266522	0.259857	0.25799	0.240852	0.208763	0.208384	0.209482	0.218327	0.222166	0.205276	0.18607	0.183614	0.191648	0.178592	0.135544	0.103679	0.0593062	0.0357573	0.025853	0.0093364
			51.1619		0	0.356221	0.480282	0.511619	0.468564	0.465664	0.465549	0.466201	0.444215	0.4323	0.385593	0.421684	0.381468	0.372257	0.370292	0.338596	0.287663	0.239278	0.194809	0.13241	0.142021	0.134286	0.154002	0.123563	0.11724	0.10405	0.0853882	0.0862246
			57.0046		0	0.374637	0.545165	0.570046	0.539988	0.47648	0.363996	0.374622	0.345383	0.337992	0.308507	0.298847	0.267509	0.255058	0.220021	0.151173	0.120843	0.106805	0.0885446	0.0483618	0.0206056	0.00542812	-0.0302366	-0.0496031	-0.0843545	-0.0832226	-0.0950169	-0.100094
			49.5534		0	-0.0252525	-0.0537912	0.271397	0.146596	0.291773	0.267559	0.495534	0.317329	0.352124	0.375149	0.122868	-0.00526751	-0.0838443	0.0689475	0.0492892	-0.0150034	-0.0868263	-0.109263	-0.0604608	-0.0527091	-0.0877777	-0.0986947	-0.127923	-0.139215	-0.156402	-0.167001	-0.192821
			36.9347		0	0.0448204	0.272812	0.296812	0.329046	0.322388	0.369347	0.325054	0.36593	0.357581	0.317623	0.308399	0.319466	0.32588	0.34037	0.332817	0.328079	0.329832	0.31897	0.314193	0.302766	0.308281	0.284345	0.277788	0.282987	0.282194	0.254386	0.200789
			63.7797		0	0.0649141	0.154508	0.347976	0.444298	0.522723	0.580639	0.637797	0.568319	0.533549	0.539381	0.456022	0.415515	0.391424	0.367229	0.364123	0.339425	0.300701	0.286682	0.283527	0.258164	0.231757	0.174864	0.153469	0.121044	0.079579	0.0553251	0.031697
			22.9225		0	0.17199	0.229225	0.22781	0.200733	0.203948	0.21697	0.180634	0.202218	0.202076	0.182801	0.200775	0.194201	0.183872	0.179028	0.161989	0.175982	0.183396	0.154806	0.163532	0.153349	0.154017	0.125743	0.112732	0.112764	0.119725	0.092624	0.0596211
			61.0062		0	0.0662969	0.197929	0.339148	0.449505	0.505579	0.525558	0.562863	0.533929	0.563351	0.610062	0.599555	0.594339	0.602854	0.558234	0.52826	0.499463	0.497856	0.486243	0.483435	0.481139	0.472449	0.434281	0.401679	0.374069	0.351541	0.323187	0.301792
			22.7234		0	0.153249	0.165794	0.190122	0.201447	0.194031	0.227234	0.203809	0.197309	0.206719	0.204471	0.20976	0.219039	0.224689	0.211578	0.195656	0.194189	0.181677	0.165595	0.160751	0.141813	0.127859	0.127408	0.125661	0.0951619	0.0718855	0.0623327	0.0407824
			32.6823		0	0.200965	0.283945	0.299443	0.326823	0.290339	0.296222	0.316615	0.222055	0.192826	0.160403	0.129544	0.171252	0.065405	0.135852	0.0212886	-0.0543108	0.0560082	-0.059831	-0.146131	-0.19913	-0.179956	-0.10974	-0.144214	-0.172495	-0.176768	-0.192763	-0.197598
