# Supplementary material for: An hourglass circuit motif transforms a motor program via subcellularly localized muscle calcium signaling and contraction
Source: eLife journal article supplement (doi:10.7554/elife.59341), 2021-07-02
Supplement: fig4-figsupp1-data1 [file Scoring M2 survival in nEx2905.xlsx]

## Sheet: Raw data
				scored by nIs310 GFP marker
	day	stage	condition	M2s present	M2s absent	1 M2 present/can't tell whether second M2 is gone
	2018-12-10	L1	no array	31	0	1
			array	14	4	2
	2018-12-14	Young adult	no array	12	0
			array	15	17
	2018-12-14		Pick pharynx with high mCherry pm expression on dissecting scope
			array w high pm mCherry	12	14
			array w low pm mCherry	2	0
			Pick pharynx with low mCherry pm expression on dissecting scope
			array w high pm mCherry	2	1
			array w low pm mCherry	20	0
	2018-12-18		Pick pharynx with high mCherry pm expression on dissecting scope
			array w high pm mCherry	7	13	4
			array w low pm mCherry	1	0	0
			Pick pharynx with low mCherry pm expression on dissecting scope
			array w high pm mCherry	4	1	0
			array w low pm mCherry	18	1	4		The one low mCherry animal with missing M2s did have dim, visible mCherry in pharyngeal muscle
	2019-03-06		Pick pharynx with high mCherry pm expression on dissecting scope
			array w high pm mCherry	7	18	14
			array w low pm mCherry	0	0	0
			Pick pharynx with low mCherry pm expression on dissecting scope
			array w high pm mCherry	3	0	2
			array w low pm mCherry	26	0	2

## Sheet: Fraction M2s killed
		Day	Condition	M2s present	M2s absent	Not sure	n	fraction M2s killed
		2018-12-14	no array	12	0	0	12	0
			array	15	17	0	32	0.53125
			array w high mCherry
		2018-12-14		12	14	0	26	0.538462
		2018-12-18		7	13	4	20	0.65
		2019-03-06		7	18	14	25	0.72
							71	0.636154
			array w low mCherry
		2018-12-14		20	0	0	20	0
		2018-12-18		18	1	4	19	0.0526316
		2019-03-06		26	0	2	26	0
							65	0.0175439
