# Supplementary material for: An hourglass circuit motif transforms a motor program via subcellularly localized muscle calcium signaling and contraction
Source: eLife journal article supplement (doi:10.7554/elife.59341), 2021-07-02
Supplement: fig5-data1 [file Sando et al. Figure 5.xlsx]

## Sheet: Figure 5C
					Pump type definitions:		Filter state	Valve state	Designation
							closed	closes	Feeding
							open	closes	Gulping
							closed	stays open	Filter-spitting
							open	stays open	Spitting
	Genotype	Date	Worm	No. each pump type (before light)							No. each pump type (during light)									File Name (.avi)
				Feeding	Gulping	Filter-spitting	Spitting	Unscorable	Fraction of feeding pumps that are gulps		Feeding	Gulping	Filter-spitting	Spitting	Unscorable	Fraction of pumps with open flaps	approximation of ratios of 0?	log(fraction) for statistics in Fig 3O
																Feeding pumps:
	lite-1 gur-3	2015.04.22	1	45	0	0	0	0	0		47	0	0	0	0	0	approximate 0.0 to 0.1	-1		lite1_gur3_nEx2144minus_1umBeads_01_20150422
		2015.04.22	2	24	1	10	3	1	0.04		40	5	0	0	0	0.111111	n/a	-0.954243		lite1_gur3_nEx2144minus_1umBeads_02_20150422
		2015.04.22	3	39	0	8	4	2	0		49	0	0	0	0	0	approximate 0.0 to 0.1	-1		lite1_gur3_nEx2144minus_1umBeads_03_20150422
		2015.04.22	4	56	0	0	0	0	0		46	1	1	7	0	*See note	n/a	#VALUE!		lite1_gur3_nEx2144minus_1umBeads_04_20150422
		2015.04.22	5	35	21	0	0	0	0.375		25	2	0	0	24	0.0740741	n/a	-1.13033		lite1_gur3_nEx2144minus_1umBeads_05_20150422
																Spitting pumps:
	lite-1 gur-3; nEx2144	2015.04.22	1	35	8	0	0	2	0.186047		3	4	13	15	2	0.535714	n/a	-0.271067		lite1_gur3_nEx2144plus_1umBeads_01_20150422
		2015.04.22	2	33	0	0	0	3	0		3	0	7	12	16	0.631579	n/a	-0.199572		lite1_gur3_nEx2144plus_1umBeads_02_20150422
		2015.04.22	3	45	0	0	0	0	0		0	0	5	13	2	0.722222	n/a	-0.141329		lite1_gur3_nEx2144plus_1umBeads_03_20150422
		2015.04.22	4	15	0	0	0	38	0		8	1	6	27	8	0.818182	n/a	-0.0871502		lite1_gur3_nEx2144plus_1umBeads_04_20150422
		2015.04.22	5	51	5	0	0	2	0.0892857		9	13	10	18	1	0.642857	n/a	-0.191886		lite1_gur3_nEx2144plus_1umBeads_05_20150422

## Sheet: Figure 5H
					Pump type definitions:		Filter state	Valve state	Designation
							closed	closes	Feeding
							open	closes	Gulping
							closed	stays open	Filter-spitting
							open	stays open	Spitting
	Genotype	Date	Worm	No. each pump type (before light)							No. each pump type (during light)								File Name (.avi)
				Feeding	Gulping	Filter-spitting	Spitting	Unscorable	Fraction of feeding pumps that are gulps		Feeding	Gulping	Filter-spitting	Spitting	Unscorable	Fraction of pumps with open flaps	approximation of ratios of 0?	log(fraction) for statistics in Fig 3O
																Spitting pumps
	lite-1 gur-3; nIs678; nEx2144 - mock-ablated	2015.06.04	1	26	0	0	0	18	0		0	0	0	22	3	1	n/a	0	nIs678_lite1_gur3_nEx2144_mock_01_20150604
	*nEx2144 refers to I2promoter::gur-3(+)	2015.06.04	2	41	4	0	0	5	0.0888889		49	1	0	0	1	censored - no spits	n/a	n/a	nIs678_lite1_gur3_nEx2144_mock_02_20150604
		2015.06.05	5	45	0		0	9	0		17	0	10	4	9	0.285714	n/a	-0.544068	nIs678_lite1_gur3_nEx2144_mock_05_20150605
		2015.06.05	6	33	1	0	0	16	0.0294118		7	5	7	8	22	0.533333	n/a	-0.273001	nIs678_lite1_gur3_nEx2144_mock_06_20150605
		2015.06.04	7	57	0	1	1	0	0		6	0	9	7	8	0.4375	n/a	-0.359022	nIs678_lite1_gur3_nEx2144_mock_07_20150604
		2015.06.04	9	30	0	0	0	14	0		9	1	8	9	16	0.529412	n/a	-0.276206	nIs678_lite1_gur3_nEx2144_mock_09_20150604
		2015.06.05	11	28	6	0	0	15	0.176471		17	9	6	6	4	0.5	n/a	-0.30103	nIs678_lite1_gur3_nEx2144_mock_11_20150605
		2015.06.05	12	22	0	0	0	16	0		0	0	7	9	10	0.5625	n/a	-0.249877	nIs678_lite1_gur3_nEx2144_mock_12_20150605
		2015.06.04	13	6	15	0	0	11	0.714286		1	3	0	30	4	1	n/a	0	nIs678_lite1_gur3_nEx2144_mock_13_20150604
		2015.06.04	15	36	15	0	0	4	0.294118		15	36	0	0	1	censored - no spits	n/a	n/a	nIs678_lite1_gur3_nEx2144_mock_15_20150604
		2015.06.05	16	25	9	0	0	19	0.264706		1	1	3	28	1	0.903226	n/a	-0.0442037	nIs678_lite1_gur3_nEx2144_mock_16_20150605
																Feeding pumps
	lite-1 gur-3; nIs678 - M1-ablated	2015.06.05	2	0	1	0	0	24	not enough scorable pumps		0	0	0	0	3	censored - not enough pumps	n/a	n/a	nIs678_lite1_gur3_nEx2144_M1minus_02_20150605
		2015.06.05	4	51	0	0	0	1	0		50	0	0	0	5	0	approximate 0.0 to 0.1	-1	nIs678_lite1_gur3_nEx2144_M1minus_04_20150605
		2015.06.04	8	45	4	0	0	4	0.0816327		24	2	0	9	14	0.0769231	Note: to be consistent with the analysis of gur-3 mutants in Fig 3O, these few spits were not scored for this animal; i.e., the ratio reflects gulping / all feeding pumps	-1	nIs678_lite1_gur3_nEx2144_M1minus_08_20150604
		2015.06.04	9	17	1	0	0	15	0.0555556		5	1	0	0	9	0.166667	n/a	-0.778151	nIs678_lite1_gur3_nEx2144_M1minus_09_20150604
		2015.06.04	10	32	7	0	0	3	0.179487		13	0	0	0	6	0	approximate 0.0 to 0.1	-1	nIs678_lite1_gur3_nEx2144_M1minus_10_20150604
		2015.06.04	11	27	1	2	0	1	0.0357143		3	0	0	0	6	censored - not enough pumps	n/a	n/a	nIs678_lite1_gur3_nEx2144_M1minus_11_20150604
		2015.06.05	14	28	4	0	0	30	0.125		20	0	0	0	15	0	approximate 0.0 to 0.1	-1	nIs678_lite1_gur3_nEx2144_M1minus_14_20150605
		2015.06.04	15	37	0	0	0	18	0		13	3	0	0	3	0.1875	n/a	-0.726999	nIs678_lite1_gur3_nEx2144_M1minus_15_20150604
		2015.06.05	16	15	6	0	0	28	0.285714		14	1	0	0	6	0.0666667	n/a	-1.17609	nIs678_lite1_gur3_nEx2144_M1minus_16_20150605
		2015.06.05	17	35	2	0	0	14	0.0540541		29	3	0	0	11	0.09375	n/a	-1.02803	nIs678_lite1_gur3_nEx2144_M1minus_17_20150605
		2015.06.05	18	39	0	0	0	5	0		36	0	0	0	1	0	approximate 0.0 to 0.1	-1	nIs678_lite1_gur3_nEx2144_M1minus_18_20150605
