# Supplementary material for: An hourglass circuit motif transforms a motor program via subcellularly localized muscle calcium signaling and contraction
Source: eLife journal article supplement (doi:10.7554/elife.59341), 2021-07-02
Supplement: fig6-data1 [file Fig 6H-6I spitting and pumping inhibition.xlsx]

## Sheet: spitting
	genotype	worm	overall spitting rate	total spits in light	spits in		missing in light (%)	total scorable time (s)		1-10k	10-20k	20-30k		spitting timestamps:
	lite-1; mock
		2	1.12956	10	7		11.47	8.853		0	1147	1898		13856	14036	14301	16671	16861	17176	17381	17576	18506	18746
		3	2.7	27	20		0	10		626	0	0		13015	13177	13399	13753	14017	14305	14461	15571	15793	16039	16291	16465	16639	16825	17035	17173	17353	17599	17857	18001	18205	18637	18835	19063	19315	19705	19897	20071	20299	20551	20791
		4	0.9	9	8		0	10		0	0	490		11467	17365	17611	17773	17977	18169	18427	19603	19813	20011	20359
		7	2.75599	26	15		5.66	9.434		1496	566	896		11605	11995	12133	12775	12949	13639	14161	14329	14623	14773	14935	15841	15997	16405	16537	16705	17209	17389	17575	17779	18451	19015	19237	19459	19777	19957	20149	20389	20605
		8	0.3	3	1		0	10		0	0	544		12451	14257	19897	20779
		9	1	10	2		0	10		0	0	908		10663	10903	11155	11323	12337	12709	13165	13399	15589	15859	21169	21463
		10	0.9	9	9		0	10		1120	0	476		18265	18409	18583	18739	19081	19237	19417	19765	19957	20107	20287	20617
		11	0.898069	8	3		10.92	8.908		998	1092	1302		12181	13531	13675	13843	14053	15931	16105	16297
		average:	1.32295
	lite-1; I2-ablated
		1	0.733245	5	5		31.81	6.819		5750	3181	1334		15965	16135	16377	16635	16873
		4	3.3	33	20		0	10		122	0	173		9455	9719	10664	10829	11048	11201	11468	11603	11822	12002	12251	12446	12659	12824	13088	15386	15554	15764	15971	16130	16370	16649	16820	16982	17204	17444	17654	17906	18134	18890	19058	19274	19517	19691	19928	20192
		6	3.78469	27	9		28.66	7.134		0	2866	8018		11216	11396	11581	11756	11926	12131	12326	12516	12701	12886	13151	13361	13496	13671	13931	14321	14521	14671	15941	16191	16816	17496	17736	19141	19346	19556	19871	20086
		7	3.1623	31	17		1.97	9.803		1264	197	0		12031	12246	12426	12656	12871	13071	13306	13461	13696	13886	14086	14281	14711	14951	15151	15376	15581	15801	16021	17096	17331	17531	17736	17936	18166	18421	18921	19186	19416	19691	19936	20251	20526
		8	3.9	39	19		0	10		1	0	0		11080	11281	11440	11602	11770	12013	12163	12409	12571	12775	12985	13198	13384	13585	13807	14017	14188	14404	14584	14968	15199	15412	15604	16006	16222	17044	17251	17443	17665	17896	18073	18301	18571	18826	18988	19234
		9	2.48541	23	10		7.46	9.254		0	746	236		11941	12169	12367	12529	12787	12955	13159	13375	13627	13777	13981	14215	14371	15157	16801	16963	17191	17419	17605	17845	18079	18343	18571
		10	0.2	2	0		0	10		0	0	2382		13711	13861
		12	0.4	4	4		0	10		602	0	0		955	1279	16201	16465	16771	16999
		average:	2.24571
	lite-1; I4-ablated
		1	0.103082	1	0		2.99	9.701		0	299	0		11881
		2	0.2	2	0		0	10		428	0	1525		8839	8995	9121	10243	10750	21433	22996
		3	1.2	12	6		0	10		0	0	596		11800	12214	12397	12568	12739	13219	15268	15982	16186	18628	19450	19633	20002
		4	0	0	0		4.37	9.563		0	437	928		21457	21709	24349
		5	1.85731	17	11		8.47	9.153		0	847	0		13621	13813	14179	14347	14491	14869	15115	15277	15568	16267	16501	17950	18139	18601	18928	19144	19576
		6	0.6	6	3		0	10		0	0	3496		9973	10141	10264	10483	15196	17662	17854	26026	26272	26542
		7	0.678426	6	6		11.56	8.844		0	1156	0		17731	17920	18130	18319	19384	19570
		8	0	0	0		0	10		224	0	0		n/a
		9	1.20114	11	10		8.42	9.158		0	842	0		3091	3961	4267	4747	5005	10066	17323	17497	17689	17896	18643	19087	19273	19492	19726	19906	30829
		10	0.6	6	6		0	10		0	0	440		16201	17317	18049	18835	18991	19195	20305	20449
		average:	0.643996
	lite-1 I2/I4-ablated
		1	0.409249	4	4		2.26	9.774		0	226	0		16855	19553	19757	19905	20129	20297	20459	20765	22041	30027	30459	30681	30915
		2	0.22299	2	0		10.31	8.969		302	1031	0		12607	12829	26929	27985	28399	28573	28903	29059	29251	29485	30379	30595	30769
		3	0	0	0		3.22	9.678		0	322	2288		n/a
		4	1.1	11	11		0	10		1334	0	0		637	1021	1207	1603	1855	2323	17127	17293	17541	17665	17927	18103	18307	18466	18676	18845	19876	20483	20699	20855	21067
		5	0.9	9	9		0	10		0	0	1380		18085	18321	18547	18721	18947	19171	19383	19613	19831	20037	20265	20473	23097	23259	23511	23739	23917	24143	24341	24803
		6	0	0	0		5.57	9.443		2538	557	0		n/a
		7	1.23279	12	12		2.66	9.734		0	266	0		17077	17275	17467	17659	18091	18853	19039	19237	19363	19585	19801	19993	21607	21739	21937	22147	22375
		10	0.1	1	0		0	10		0	0	356		3031	5101	5275	6361	6601	8599	10333	28795	28969	29227
		average:	0.495629
[truncated: 5 more columns]

## Sheet: pumping inhibition
	Genotype/condition	Date	Worm	Pumping inhibition in light (% of pumping rate before light)	Pumping rate before light (pump/sec)	Pumping rate during light (pump/sec)	Number of pumps before light	Number of pumps during light	Percent frames missing before light	Percent frames missing during light	censored frames					File name	Notes	Grinder pump timestamps
	lite-1; mock										1-10k	10-20k	10k-13k	20-30k
		20150610	2	25.6718	4.4	1.12956	44	10	0	11.47	0	1147	1036	1898				141	366	551	776	1001	1221	1431	1666	1886	2106	2326	2551	2781	2996	3231	3466	3691	3956	4156	4371	4591	4801	5006	5206	5436	5661	5851	6081	6306	6526	6756	6926
		20150610	3	52.4944	5.3339	2.8	50	28	6.26	0	626	0	0	0				121	301	517	691	877	1039	1237	1453	1675	1867	2053	2275	2449	2701	2893	3085	3319	3511	3691	3889	4075	4279	4483	4669	4843	5023	5263	5467	5665	5839	6025	6223
		20150610	4	72.549	5.1	3.7	51	37	0	0	0	0	0	490				145	289	463	625	811	967	1147	1321	1495	1645	1837	2035	2197	2359	2563	2755	2923	3115	3289	3613	4117	4303	4471	4669	4831	5023	5191	5359	5545	5725	5905	6283
		20150610	7	75.4678	5.05644	3.81598	43	36	14.96	5.66	1496	566	0	896				97	445	619	781	1003	1189	1363	1549	1741	1927	2113	2281	2479	2659	2839	3031	3205	3373	3577	3787	3931	4105	4297	4477	4687	5041	5239	5419	5629	5797	7465	7651
		20150611	8	6.66667	4.5	0.3	45	3	0	0	0	0	0	544				235	415	625	829	1063	1273	1465	1663	1849	2077	2275	2479	2695	2857	3079	3271	3493	3691	3907	4135	4333	4519	4729	4945	5137	5359	5563	5797	5989	6241	6481	6709
		20150610	9	36.8421	3.8	1.4	38	14	0	0	0	0	0	908				217	445	679	913	1093	1369	1567	1801	2023	2239	2479	2719	2923	3127	3349	3793	4045	4201	4441	4651	4903	5173	5437	5695	5923	7057	7339	7567	7753	7993	8191	8461
		20150610	10	85.3176	5.74324	4.9	51	49	11.2	0	1120	0	0	476				163	301	469	643	811	979	1195	1321	1477	1657	1825	1987	2341	2503	2665	2851	2995	3163	3367	3523	4231	4405	5059	5215	5377	5539	5695	5863	6031	6229	6391	6577
		20150610	11	26.7499	3.77694	1.01033	34	9	9.98	10.92	998	1092	862	1302				121	319	517	703	1135	1321	1519	1723	1933	2329	2545	2731	2923	3133	3343	3595	4207	4687	4981	5263	5593	5881	6139	6421	6751	7027	7321	7591	7801	8869	9259	9463
			average:	47.7199
	lite-1; I2-ablated
		20150610	1	85.0098	5.17525	4.39947	22	30	57.49	31.81	5749	3181	2003	1334				181	1639	1807	2029	2659	2863	3085	3307	3511	3721	3937	4129	4351	4573	4789	5005	5227	6709	6895	7117	7759	7957	11695	12295	12565	12761	12993	13233	13481	14089	14305	14517
		20150610	4	91.0325	5.16299	4.7	51	47	1.22	0	122	0	0	173				181	331	531	731	921	1096	1271	1476	1666	1831	2051	2266	2451	2706	2891	3091	3286	3471	3651	3841	4021	4256	4431	4596	4816	5001	5181	5376	5581	5766	5946	6126
		20150610	6	98.1217	5	4.90608	50	35	0	28.66	0	2866	0	8018				176	356	546	731	916	1101	1276	1491	1691	1856	2056	2236	2416	2641	2816	3001	3191	3371	3586	3781	3966	4181	4371	4551	4731	4931	5116	5321	5506	5711	5871	6056
		20150610	7	91.2374	4.80769	4.38641	42	43	12.64	1.97	1264	197	197	0				166	371	556	791	986	1191	1391	1811	2016	2236	2421	2631	2796	3026	3221	3406	3616	3846	4031	4241	4456	4651	4846	5056	5261	5456	5671	5881	6101	6296	6511	6741
		20150611	8	95.7447	4.7	4.5	47	45	0	0	0	0	0	0				223	439	643	859	1045	1243	1465	1651	1849	2065	2221	2443	2905	3133	3325	3523	3721	3943	4135	4309	4543	4735	4915	5125	5329	5515	5701	5917	6115	6349	6547	6751
		20150610	9	96.3156	4.6	4.43052	46	41	0	7.46	0	746	0	236				223	397	583	745	943	1123	1309	1489	1675	1861	2023	2239	2437	2605	2797	2965	3181	3373	3547	3745	3925	4117	4525	4693	4885	5113	5287	5455	5857	6043	6253	6463
		20150610	10	105.128	3.9	4.1	39	41	0	0	0	0	0	2382				139	313	667	865	1039	1219	1555	1777	2287	2461	2635	2965	3325	3493	3655	3841	4027	4201	4387	4543	4729	5131	5305	5473	5647	5863	6223	6901	7399	7561	7885	8203
		20150610	12	109.22	3.93701	4.3	37	43	6.02	0	602	0	0	0				283	955	1279	1573	1759	2035	2341	2527	2743	2983	3241	3457	3709	4147	4369	4657	4903	5179	5455	5683	5953	6187	6409	6631	6901	7117	7381	7693	7939	8215	8449	8671
			average:	96.4762
	lite-1; I4-ablated
		20150610	1	67.5366	5.8	3.91712	58	38	0	2.99	0	299	299	0				133	271	433	601	775	919	1075	1243	1411	1579	1747	1903	2053	2263	2419	2569	2737	2905	3079	3229	3415	3553	3715	3877	4057	4195	4369	4537	4873	5017	5173	5335
		20150610	2	7.36308	4.07438	0.3	39	3	4.28	0	428	0	0	1525				25	259	433	835	1057	1351	1609	1783	1969	2161	2317	2539	2941	3271	3505	4063	4471	4759	4951	5143	5353	5563	5911	6193	6421	6859	7087	7339	7537	7699	7855	8203
		20150611	3	58.3333	4.8	2.8	48	28	0	0	0	0	0	596				211	373	535	697	859	1021	1177	1381	1561	1729	2065	2245	2407	2785	2965	3121	3289	3463	3613	3781	3925	4165	4303	4621	4825	5023	5179	5497	5689	5863	6073	6235
		20150610	4	22.2853	6.1	1.35941	61	13	0	4.37	0	437	0	928				175	319	475	619	847	997	1129	1279	1435	1561	1729	1873	2059	2233	2407	2563	2737	2875	3019	3211	3355	3529	3673	3829	3991	4147	4447	4609	4759	4921	5059	5275
		20150610	5	56.812	5	2.8406	50	26	0	8.47	0	847	0	0				115	355	535	787	979	1189	1363	1579	1747	2179	2347	2509	2719	2947	3139	3313	3517	3679	3865	4093	4291	4477	4669	4873	5065	5275	5473	5647	5827	6025	6217	6415
		20150610	6	17.3913	4.6	0.8	46	8	0	0	0	0	0	3496				67	265	439	631	811	1003	1225	1417	1603	1801	2011	2209	2593	2773	2947	3133	3331	3535	3727	3901	4141	4357	4573	4813	4975	5179	5359	5557	5785	5959	6703	6943
		20150610	7	32.6166	5.2	1.69607	52	15	0	11.56	0	1156	0	0				97	457	631	823	997	1171	1369	1591	1741	1921	2065	2425	2581	2779	2965	3121	3469	3631	3823	3997	4165	4333	4513	4705	4855	5053	5233	5623	5731	5971	6157	6343
		20150610	8	2.12522	4.7054	0.1	46	1	2.24	0	224	0	0	0				151	319	505	703	877	1105	1357	1543	1759	1939	2161	2359	2575	2797	3001	3223	3427	3637	3847	4021	4237	4447	4639	4837	5047	5221	5467	5683	5887	6085	6289	6493
		20150610	9	40.0379	3	1.20114	30	11	0	8.42	0	842	0	0				211	421	697	907	1141	1375	1603	2287	2503	2761	3091	3961	4267	4519	4747	5005	5197	5491	5743	5983	6253	6559	6793	7021	7789	8833	9049	9259	9469	9727	10066	17323
		20150610	10	25.5814	4.3	1.1	43	11	0	0	0	0	0	440				223	385	547	889	1159	1363	1525	1729	1879	2065	2215	2371	2647	3013	3271	3469	3625	3793	3997	4453	4609	4795	5041	5239	5401	5629	5815	5989	6145	6355	6535	6859
			average:	31.8979
	lite-1 I2/I4-ablated
		20150610	1	106.126	5.56816	5.90924	54	53	3.02	10.31	302	1031	1031	0				181	355	577	751	943	1117	1309	1465	1645	1831	2023	2221	2401	2557	2749	2935	3101	3281	3489	3645	3809	3989	4169	4377	4557	4741	4933	5109	5285	5473	5641	5861
		20150610	2	96.1183	4.3	4.13309	43	40	0	3.22	0	322	322	2288				295	553	787	1003	1249	1453	1651	1861	2071	2287	2503	2725	2947	3187	3403	3625	3883	4105	4339	4555	4783	4987	5185	5425	5677	6001	6217	6433	6631	6853	7075	7291
		20150610	3	90.3477	5.42349	4.9	47	49	13.34	0	1334	0	0	0				181	367	595	817	1015	1201	1411	1639	1843	2059	2251	2443	2635	2875	3217	3421	3619	3835	4015	4213	4411	4615	4819	5035	5239	5413	5623	5833	6037	6247	6427	6637
		20150610	4	110.87	4.6	5.1	46	51	0	0	0	0	0	1380				103	283	481	637	1021	1207	1447	1603	1855	2083	2323	2497	2677	2911	3061	3307	4495	4657	4855	5017	5215	5413	5623	5791	5951	6111	6316	6521	6676	6866	7081	7281
		20150610	5	77.4088	6.5666	5.08313	49	48	25.38	5.57	2538	557	557	0				237	449	661	885	1085	1277	1473	1681	1861	2061	2265	2441	2657	2905	3057	3253	3473	3661	3885	4065	4273	4477	4693	4881	5069	5269	5453	5653	5869	6041	6277	6465
		20150610	6	115.261	4.1	4.7257	41	46	0	2.66	0	266	0	0				196	371	586	756	926	1146	1321	1516	3001	3191	3361	3526	3701	3871	4061	4251	4446	4636	4816	5026	5191	5531	5711	6091	6246	6446	6651	6846	7031	7186	7376	7596
		20150610	7	102	5	5.1	50	51	0	0	0	0	0	356				235	409	595	793	1003	1213	1387	1573	1777	1963	2143	2317	2509	2719	2893	3079	3289	3463	3649	3895	4063	4249	4459	4645	4831	5035	5227	5413	5623	5803	5965	6163
		20150611	10	29.6296	2.7	0.8	27	8	0	0	0	0	0	0				373	607	1471	1717	1927	2251	2533	2761	3031	3955	4243	4597	4843	5101	5275	5947	6181	6361	6601	6967	7519	7915	8341	8599	9037	9271	9487	10333	11647	12709	13219	13789
			average:	90.9701
[truncated: 4,928 more columns]
